# Supplementary material for: Investigating the crystal engineering of the pillared paddlewheel metal–organic framework Zn2(NH2BDC)2DABCO
Source: Royal Society of Chemistry journal article supplement (doi:10.1039/c8ce00848e), 2018-01-01
Supplement: c8ce00848e1.pdf [file c8ce00848e1.pdf]

## **Electronic Supplementary Information**

### **Investigating the Crystal Engineering of the Pillared Paddlewheel Metal-Organic Framework $\text{Zn}_2(\text{NH}_2\text{BDC})_2\text{DABCO}$**

D. T. McGrath,<sup>a</sup> V. A. Downing<sup>a</sup> and M. J. Katz<sup>a,\*</sup>

<sup>a</sup> Department of Chemistry, Memorial University of Newfoundland, 230 Elizabeth Avenue, St. John's, Newfoundland and Labrador, Canada

#### **Table of contents**

|                                          |    |
|------------------------------------------|----|
| Section S1. Additional synthetic details | S2 |
| Section S2. Gas adsorption data          | S3 |
| Section S3. NMR data                     | S4 |
| Section S4. SEM data                     | S5 |

## Section S1. Additional synthetic details

**Table S1** Experimental modifications to original prep, along with exact masses for synthesis, BET surface area, and NMR ratios. Reagent A is DABCO, reagent B is  $\text{Zn}(\text{NO}_3)_2 \cdot 6\text{H}_2\text{O}$ , and reagent C is  $\text{NH}_2\text{BDC}$ .

|                      | Modification                                                   | Reagent A (g) | Reagent B (g) | Reagent C (g) | BET Surface Area ( $\text{m}^2/\text{g}$ ) | NMR Proton Ratio ( $\text{NH}_2\text{BDC}:\text{DABCO}$ ) |
|----------------------|----------------------------------------------------------------|---------------|---------------|---------------|--------------------------------------------|-----------------------------------------------------------|
| Original Batch       | —                                                              | 0.0947        | 0.5010        | 0.2765        | 950                                        | 6:6.00                                                    |
| Reagent Amount       | -30% Reagent A                                                 | 0.0663        | 0.5011        | 0.2765        | 485                                        | 6:2.36                                                    |
|                      | -20% Reagent A                                                 | 0.0758        | 0.5012        | 0.2766        | 515                                        | 6:4.80                                                    |
|                      | -10% Reagent A                                                 | 0.0853        | 0.5012        | 0.2766        | 450                                        | 6:5.79                                                    |
|                      | +10% Reagent A                                                 | 0.1042        | 0.5015        | 0.2765        | 470                                        | 6:6.78                                                    |
|                      | +20% Reagent A                                                 | 0.1133        | 0.5011        | 0.2765        | 230                                        | 6:4.35                                                    |
|                      | +30% Reagent A                                                 | 0.1237        | 0.5011        | 0.2765        | 230                                        | 6:9.96                                                    |
|                      | -10% Reagent B                                                 | 0.0947        | 0.4513        | 0.2765        | 390                                        | 6:5.05                                                    |
|                      | -5% Reagent B                                                  | 0.0947        | 0.4763        | 0.2761        | 530                                        | 6:6.43                                                    |
|                      | +5% Reagent B                                                  | 0.0951        | 0.5260        | 0.2763        | 260                                        | 6:6.00                                                    |
|                      | +10% Reagent B                                                 | 0.0947        | 0.5513        | 0.2765        | 500                                        | 6:4.68                                                    |
|                      | +20% Reagent B                                                 | 0.0947        | 0.6012        | 0.2764        | 525                                        | 6:0.69                                                    |
|                      | +30% Reagent B                                                 | 0.0947        | 0.6515        | 0.2765        | 530                                        | 6:0.58                                                    |
|                      | -30% Reagent C                                                 | 0.0947        | 0.5010        | 0.1936        | 290                                        | 6:9.21                                                    |
|                      | -20% Reagent C                                                 | 0.0948        | 0.5010        | 0.2212        | 1085                                       | 6:7.10                                                    |
|                      | -10% Reagent C                                                 | 0.0946        | 0.5013        | 0.2488        | 535                                        | 6:6.95                                                    |
|                      | +10% Reagent C                                                 | 0.0947        | 0.5007        | 0.3043        | 674                                        | 6:4.96                                                    |
|                      | +20% Reagent C                                                 | 0.0947        | 0.5008        | 0.3318        | 900                                        | 6:4.64                                                    |
|                      | +30% Reagent C                                                 | 0.0945        | 0.5010        | 0.3595        | 1400                                       | 6:7.35                                                    |
|                      | +40% Reagent C                                                 | 0.0946        | 0.5008        | 0.3870        | 650                                        | 6:5.04                                                    |
| Reagent Grade        | All reagents new                                               | 0.0949        | 0.5009        | 0.2765        | 341                                        | 6:7.40                                                    |
|                      | Reagents A & C new                                             | 0.0949        | 0.5008        | 0.2765        | 683                                        | 6:10.20                                                   |
| Solvent Alterations  | Dry DMF                                                        | 0.0949        | 0.5010        | 0.2765        | 325                                        | 6:3.91                                                    |
|                      | 90% DMF/10% EtOH                                               | 0.0947        | 0.5010        | 0.2765        | 135                                        | No $\text{NH}_2\text{BDC}$ protons                        |
|                      | DEF                                                            | 0.0945        | 0.5010        | 0.2767        | 65                                         | No $\text{NH}_2\text{BDC}$ protons                        |
| Heating Conditions   | 120°C sand bath                                                | 0.0946        | 0.5013        | 0.2764        | 475                                        | 6:7.55                                                    |
|                      | Suspended in oven                                              | 0.0948        | 0.5010        | 0.2765        | 450                                        | 6:6.23                                                    |
| Heating Duration     | 24 hours                                                       | 0.0950        | 0.5007        | 0.2765        | 322                                        | 6:6.47                                                    |
| Preheating Additives | +3 drops $\text{HNO}_3$                                        | 0.0947        | 0.5010        | 0.2768        | 200                                        | 6:6.78                                                    |
|                      | +100 mg $\text{H}_2\text{O}$                                   | 0.0946        | 0.5012        | 0.2765        | 165                                        | 6:10.01                                                   |
| Combo Modifications  | Reagents A & C new/120°C sand bath                             | 0.0947        | 0.5010        | 0.2765        | 402                                        | 6:9.06                                                    |
|                      | Reagents A & C new/Suspended in oven                           | 0.0947        | 0.5012        | 0.2764        | 673                                        | 6:8.61                                                    |
|                      | +30% Reagent C/120°C sand bath                                 | 0.0945        | 0.5009        | 0.3594        | 522                                        | 6:6.91                                                    |
|                      | +30% Reagent C/Suspended in oven                               | 0.0948        | 0.5013        | 0.3595        | 670                                        | 6:7.28                                                    |
|                      | +30% Reagent C/+100 mg $\text{H}_2\text{O}$                    | 0.0947        | 0.5010        | 0.3595        | 643                                        | 6:8.72                                                    |
|                      | +30% Reagent C/+100 mg $\text{H}_2\text{O}$ /Suspended in oven | 0.0947        | 0.5012        | 0.3593        | 630                                        | 6:7.50                                                    |

## Section S2. Gas adsorption data

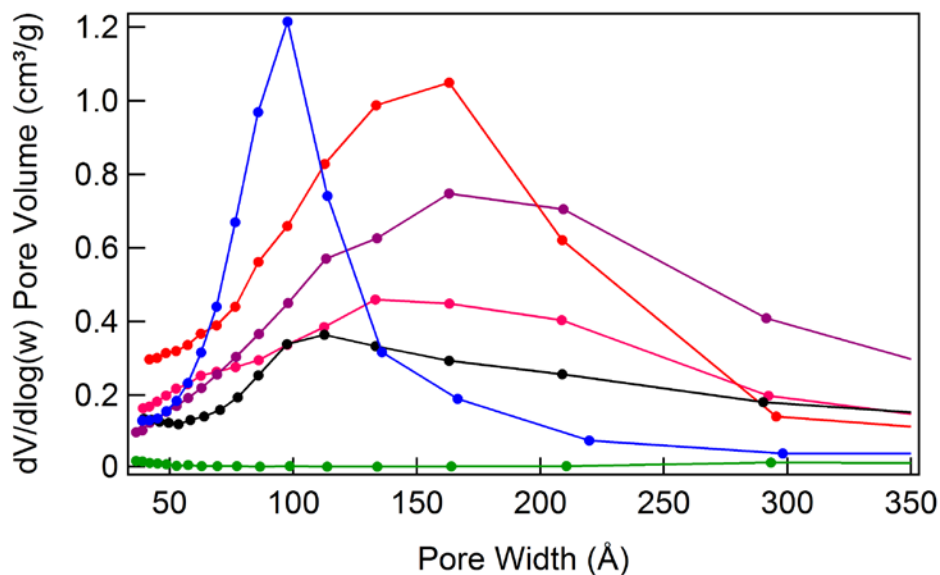

**Fig. S1** BJH-PSD of the adsorption branch of the isotherms illustrated in Fig. 2 of the main text.

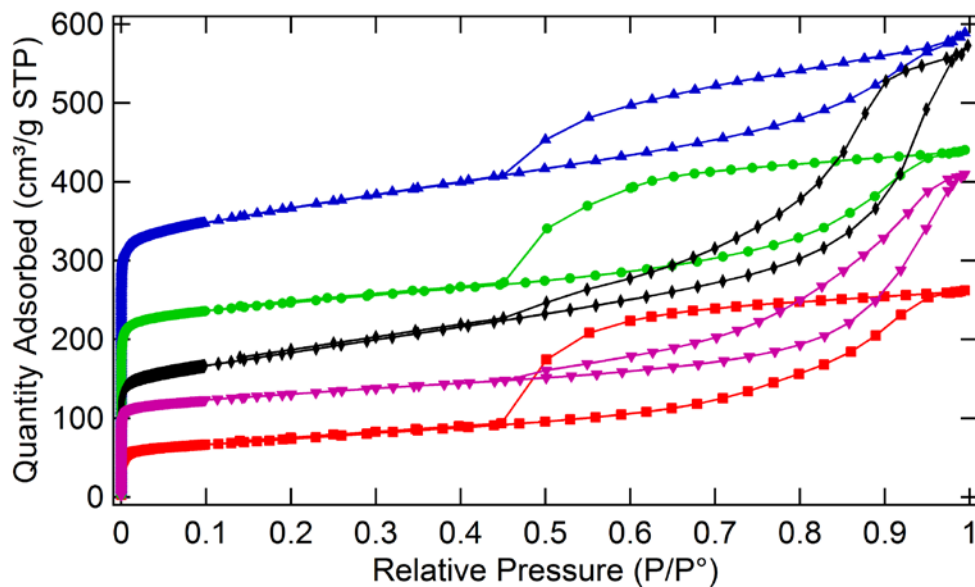

**Fig. S2** N<sub>2</sub> gas-adsorption isotherms measured at 77 K for **P1** (red squares), **P2** (purple upside-down triangles), **P3** (black diamonds), **P4** (green circles), and **P5** (blue triangles) illustrating the hysteresis loops within these samples.

### Section S3. NMR Data

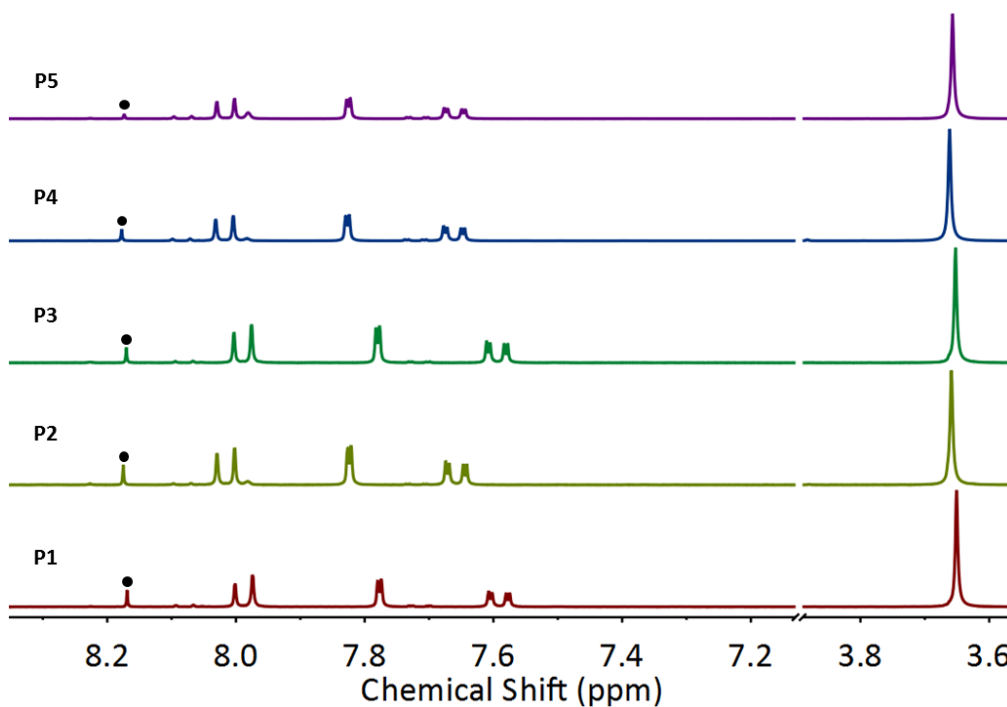

**Fig. S3** <sup>1</sup>H NMR of acid digested (D<sub>2</sub>SO<sub>4</sub>/DMSO-d<sub>6</sub>) **P1 – P5** Zn<sub>2</sub>(NH<sub>2</sub>BDC)<sub>2</sub>DABCO. The peak at 3.65 is due to DABCO. The peaks ranging from 7.5 – 8.1 are due to NH<sub>2</sub>BDC. Variations in chemical shifts between samples are due to the slight variation in D<sub>2</sub>SO<sub>4</sub> concentration. Peaks marked with a black circle indicate the presence of residual DMF.

#### Section S4. SEM Data

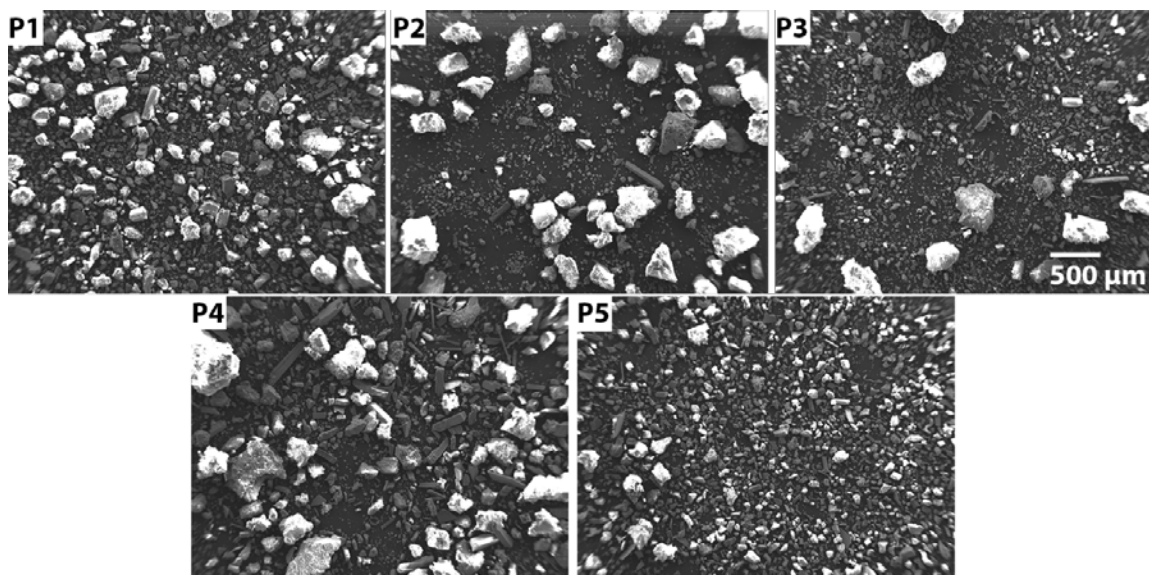

**Fig. S4** SEM images of P1 – P5 at the same magnification (scale bar shown in P3). All the samples were carbon coated to minimize charging. Generally speaking, two features are observed within each sample: large insulating chunks and smaller rectangular prisms that are consistent with the morphology of  $\text{Zn}_2(\text{NH}_2\text{BDC})_2\text{DABCO}$ . We cannot conclude that other compounds are not present. In general, compared with the surface area data, as more insulating chunks are present and less rectangular prisms of  $\text{Zn}_2(\text{NH}_2\text{BDC})_2\text{DABCO}$ , the lower the overall surface area. Thus, we hypothesize that the insulating chunks are responsible for the less than ideal surface area observed in this work.
